# Supplementary material for: Using Patient Experiences on Dutch Social Media to Supervise Health Care Services: Exploratory Study
Source: PubMed Central journal article supplement (PMC4319082; doi:10.2196/jmir.3906), 2015-01-15
Supplement: jmir_v17i1e7_app1.pdf [file jmir_v17i1e7_app1.pdf]

Additional file 1:

| Score                                                                                 | Description                                                                                                                                                                                                                                                                                                                                                                                                        |
|---------------------------------------------------------------------------------------|--------------------------------------------------------------------------------------------------------------------------------------------------------------------------------------------------------------------------------------------------------------------------------------------------------------------------------------------------------------------------------------------------------------------|
| 0 The rating has no added value for the DHI.                                          | <ul style="list-style-type: none"><li>• Information is not relevant for the DHI</li><li>• Information is too concise to assess</li><li>• Information is not specific enough</li><li>• Information is contradictory or unclear</li></ul>                                                                                                                                                                            |
| 1 Based on this rating, a signal is added to the healthcare provider or organization. | <ul style="list-style-type: none"><li>• Information is relevant for the DHI</li><li>• Unclear whether it concerns an incident or a structural problem</li><li>• In case of similar signals, intervention is needed by the DHI.</li><li>• If this healthcare provider or organization will be visited in the near future, it is relevant to discuss this issue.</li></ul>                                           |
| 2 Based on this rating, the DHI will further investigate this issue.                  | <ul style="list-style-type: none"><li>• Information is relevant for the DHI</li><li>• Information may indicate a structural problem</li><li>• Safety of client/patient is in jeopardy and/or observed norm exceeding behaviour by a healthcare provider and/or media-sensitive issue</li><li>• Based on this information it is justified to ask for clarification (written) or to visit the organization</li></ul> |
| 3 Based on this rating, the DHI will undertake immediate action.                      | <ul style="list-style-type: none"><li>• Information is relevant for the DHI</li><li>• Based on this information, immediate intervention is required.</li><li>• This situation comprehends direct risk of serious hazard or injury of client/patient and/or humiliating situations and/or media-sensitive issue.</li><li>• Program director is directly informed since this concerns a</li></ul>                    |

serious situation.
