# Supplementary material for: Using Patient Experiences on Dutch Social Media to Supervise Health Care Services: Exploratory Study
Source: PubMed Central journal article supplement (PMC4319082; doi:10.2196/jmir.3906), 2015-01-15
Supplement: jmir_v17i1e7_app2.pdf [file jmir_v17i1e7_app2.pdf]

Additional file 2:

|                    | Focused on Dutch language? | Boolean search available? | Searches > 1 year? | Tested by DHI and not selected? | Already indexed by other sources | Judgment | Used in study |
|--------------------|----------------------------|---------------------------|--------------------|---------------------------------|----------------------------------|----------|---------------|
| Coosto             | Yes                        | Yes                       | Yes                | No                              | No                               | ++       | Yes           |
| Google             | Yes                        | Yes                       | Yes                | No                              | No                               | ++       | Yes           |
| Addict-O-Matic     | No                         | No                        | unknown            | No                              | No                               | +/-      | Yes           |
| ZorgkaartNederland | Yes                        | No                        | Yes                | No                              | Yes                              | +/-      | Yes           |
| Buzzcapture        | Yes                        | Yes                       | No                 | No                              | No                               | -        | No            |
| Facebook           | Yes                        | No                        | Yes                | No                              | Yes                              | -        | No            |
| Twitter            | Yes                        | No                        | Yes                | No                              | Yes                              | -        | No            |
| Hootsuite          | Yes                        | unknown                   | unknown            | No                              | Yes                              | -        | No            |
|                    |                            | unknow                    |                    |                                 |                                  | -        | No            |
| Radian 6           | No                         | n                         | unknown            | No                              | No                               |          |               |
| Clipit             | Yes                        | unknown                   | unknown            | Yes                             | No                               | -        | No            |
| Buzztalk           | Yes                        | unknown                   | unknown            | Yes                             | No                               | -        | No            |
